# Supplementary material for: Epidemiology and Genetic Characteristics of Porcine Reproductive and Respiratory Syndrome Virus in the Hunan and Hebei Provinces of China
Source: MDPI journal article supplement (doi:10.3390/vetsci10010063), 2023-01-16
Supplement: s1 [file s1]

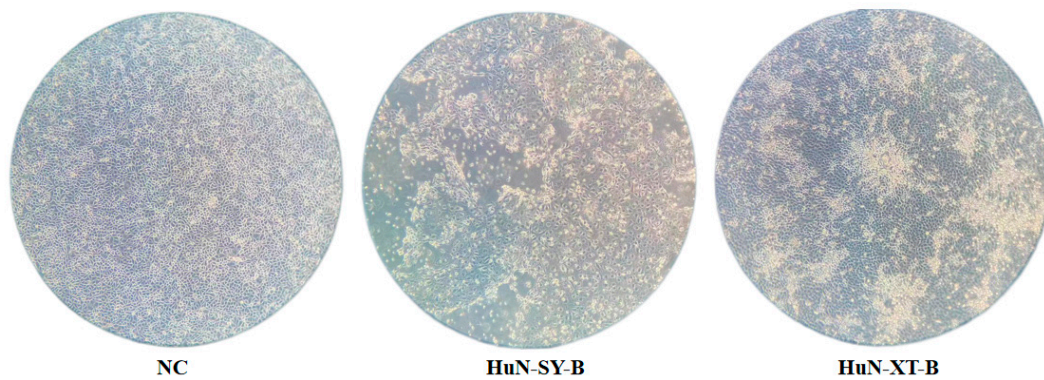

**Supplementary Figure S1.** Viral isolation and the cytopathic effect of representative PRRSV strains in Marc-145 cells. (Note: NC, negative control; HuN-SY-B and HuN-XT-B: two representative PRRSV strains obtained in the present study)

**Supplementary Table S1:** Detailed information of PRRSV strains identified in this study and reference strains, including strain name, collection year, isolation region, genotype, and GenBank accession numbers.

| Strain       | Isolation year | Isolation site         | Lineage                      | GenBank accession number |
|--------------|----------------|------------------------|------------------------------|--------------------------|
| JXA1         | 2006           | Jiangxi, China         | 8.7 (HP-PRRSV strain)        | EF112445                 |
| JXA1-P120    | 2009           | Jiangxi, China         | 8.7 (HP-PRRSV strain)        | KC422727                 |
| HuN          | 2007           | Hunan, China           | 8.7 (HP-PRRSV strain)        | EF517962                 |
| TJ           | 2006           | Tianjin, China         | 8.7 (HP-PRRSV strain)        | EU860248                 |
| FJZH         | 2015           | Fujian, China          | 8.7 (HP-PRRSV strain)        | KP998478                 |
| NJ-1106      | 2012           | Shandong, China        | 8.7 (HP-PRRSV strain)        | JX880029                 |
| HY21         | 2021           | Hunan, China           | 8.7 (HP-PRRSV strain)        | OL687155                 |
| CH-1a        | 1996           | China                  | 8.1 (Classical PRRSV strain) | AY032626                 |
| HH08         | 2011           | China                  | 8.1 (Classical PRRSV strain) | JX679179                 |
| HLJ          | 2017           | Heilongjiang, China    | 8.1 (Classical PRRSV strain) | MH422083                 |
| SD53-1603    | 2016           | Heilongjiang, China    | 1.8 (NADC30-like strain)     | MH651744                 |
| NADC30       | 2017           | Shandong, China        | 1.8 (NADC30-like strain)     | MH500776                 |
| FJ203        | 2015           | Fujian, China          | 1.8 (NADC30-like strain)     | KP860909                 |
| CHsx1401     | 2014           | Beijing, China         | 1.8 (NADC30-like strain)     | KP861625                 |
| LNWK130      | 2017           | Heilongjiang, China    | 1.5 (NADC34-like strain)     | MG913987                 |
| NADC34       | 2014           | USA                    | 1.5 (NADC34-like strain)     | MF326985                 |
| NCV-Anheal-1 | 2018           | China                  | 1.5 (NADC34-like strain)     | MH370474                 |
| VR2332       | 1992           | USA                    | 5                            | U87392                   |
| BJ-4         | 1996           | China                  | 5                            | AF331831                 |
| QYYZ         | 2011           | Guangdong, China       | 3                            | JQ308798                 |
| GM2          | 2011           | China                  | 3                            | JN662424                 |
| HuN-LD-A     | 2021           | Loudi, Hunan, China    | 8.7 (HP-PRRSV strain)        | OP219606                 |
| HuN-YY-C     | 2021           | Yiyang, Hunan, China   | 8.7 (HP-PRRSV strain)        | OP219607                 |
| HuN-SY-B     | 2021           | Shaoyang, Hunan, China | 8.7 (HP-PRRSV strain)        | OP219608                 |

|           |      |                            |                              |          |
|-----------|------|----------------------------|------------------------------|----------|
| HuN-ML-A2 | 2021 | Miluo, Hunan, China        | 8.7 (HP-PRRSV strain)        | OP219609 |
| HuN-ZZ-B  | 2021 | Zhuzhou, Hunan, China      | 8.7 (HP-PRRSV strain)        | OP219610 |
| HuN-ZJJ-A | 2021 | Zhangjiajie, Hunan, China  | 8.7 (HP-PRRSV strain)        | OP219611 |
| HuN-ZJJ-B | 2021 | Zhangjiajie, Hunan, China  | 8.7 (HP-PRRSV strain)        | OP219612 |
| HeB-HD-B  | 2021 | Handan, Heibei, China      | 8.7 (HP-PRRSV strain)        | OP219613 |
| HeB-CD-B  | 2021 | Chengde, Hebei, China      | 8.7 (HP-PRRSV strain)        | OP219614 |
| HeB-QHD-C | 2021 | Qinhuangdao, Hebei, China  | 8.7 (HP-PRRSV strain)        | OP219615 |
| HeB-SJZ-D | 2021 | Shijiazhuang, Hebei, China | 8.7 (HP-PRRSV strain)        | OP219616 |
| HeB-TS-B  | 2021 | Tangshan, Hebei, China     | 8.7 (HP-PRRSV strain)        | OP219617 |
| HuN-CD-B3 | 2021 | Changde, Hunan, China      | 8.1 (Classical PRRSV strain) | OP219618 |
| HuN-CD-B1 | 2021 | Changde, Hunan, China      | 8.1 (Classical PRRSV strain) | OP219619 |
| HuN-CD-B2 | 2021 | Changde, Hunan, China      | 8.1 (Classical PRRSV strain) | OP219620 |
| HeB-XT-B  | 2021 | Xingtai, Hebei, China      | 1.8 (NADC30-like strain)     | OP219621 |
| HeB-ZJK-A | 2021 | Zhangjiakou, Hebei, China  | 1.8 (NADC30-like strain)     | OP219622 |
| HeB-BD-A  | 2021 | Baoding, Hebei, China      | 1.8 (NADC30-like strain)     | OP219623 |
| HeB-HD-A  | 2021 | Handan, Heibei, China      | 1.8 (NADC30-like strain)     | OP219624 |
| HeB-TS-A  | 2021 | Tangshan, Hebei, China     | 1.8 (NADC30-like strain)     | OP219625 |
| HeB-SJZ-A | 2021 | Shijiazhuang, Hebei, China | 1.8 (NADC30-like strain)     | OP219626 |
| HeB-SJZ-C | 2021 | Shijiazhuang, Hebei, China | 1.8 (NADC30-like strain)     | OP219627 |
| HeB-XT-C  | 2021 | Xingtai, Hebei, China      | 1.8 (NADC30-like strain)     | OP219628 |
| HeB-XT-A  | 2021 | Xingtai, Hebei, China      | 1.8 (NADC30-like strain)     | OP219629 |
| HeB-SJZ-B | 2021 | Shijiazhuang, Hebei, China | 1.8 (NADC30-like strain)     | OP219630 |
| HeB-QHD-A | 2021 | Qinhuangdao, Hebei, China  | 1.8 (NADC30-like strain)     | OP219631 |
| HeB-QHD-B | 2021 | Qinhuangdao, Hebei, China  | 1.8 (NADC30-like strain)     | OP219632 |
| HeB-BD-B  | 2021 | Baoding, Hebei, China      | 1.8 (NADC30-like strain)     | OP219633 |
| HuN-YY-A  | 2021 | Yiyang, Hunan, China       | 1.8 (NADC30-like strain)     | OP219634 |
| HuN-CS-A  | 2021 | Changsha, Hunan, China     | 1.8 (NADC30-like strain)     | OP219635 |
| HuN-ZZ-A  | 2021 | Zhuzhou, Hunan, China      | 1.8 (NADC30-like strain)     | OP219636 |
| HuN-YY-B  | 2021 | Yiyang, Hunan, China       | 1.8 (NADC30-like strain)     | OP219637 |

|           |      |                        |                          |          |
|-----------|------|------------------------|--------------------------|----------|
| HuN-CS-B  | 2021 | Changsha, Hunan, China | 1.8 (NADC30-like strain) | OP219638 |
| HuN-ML-A1 | 2021 | Miluo, Hunan, China    | 1.8 (NADC30-like strain) | OP219639 |
| HuN-LD-B  | 2021 | Loudi, Hunan, China    | 1.8 (NADC30-like strain) | OP219640 |
| HuN-XT-B  | 2021 | Xiangtan, Hunan, China | 1.8 (NADC30-like strain) | OP219641 |
| HuN-XT-A  | 2021 | Xiangtan, Hunan, China | 1.8 (NADC30-like strain) | OP219642 |
| HeB-XT-D  | 2021 | Xingtai, Hebei, China  | 1.5 (NADC34-like strain) | OP219643 |
| HeB-CD-A  | 2021 | Chengde, Hebei, China  | 1.5 (NADC34-like strain) | OP219644 |
| HuN-ZZ-C  | 2021 | Zhuzhou, Hunan, China  | 3                        | OP219645 |
| HuN-CD-B4 | 2021 | Changde, Hunan, China  | 3                        | OP219646 |
| HuN-SY-A  | 2021 | Shaoyang, Hunan, China | 3                        | OP219647 |
| HuN-CD-A  | 2021 | Changde, Hunan, China  | 3                        | OP219648 |

**Supplemental Table S2.** Comparison of GP5 amino acid sequences of sublineage 1.8 PRRSV strains identified in the present study.

| Strains   | Amino acid sites |    |    |    |    |    |    |    |    |       |    |       |    |    |    |    |    |    |    |     |     |     |     |     |     |     |     |     |     |     |     |
|-----------|------------------|----|----|----|----|----|----|----|----|-------|----|-------|----|----|----|----|----|----|----|-----|-----|-----|-----|-----|-----|-----|-----|-----|-----|-----|-----|
|           | 13               | 15 | 18 | 19 | 25 | 26 | 27 | 30 | 31 | 32-34 | 55 | 57-59 | 61 | 72 | 79 | 81 | 90 | 94 | 98 | 101 | 102 | 104 | 120 | 124 | 127 | 128 | 145 | 151 | 158 | 153 | 170 |
| NADC30    | Q                | P  | W  | C  | F  | V  | A  | S  | A  | -ND   | W  | NEH   | S  | V  | Y  | A  | T  | I  | T  | Y   | Y   | K   | L   | A   | L   | A   | L   | R   | P   | R   | E   |
| HeB-BD-B  | Q                | P  | W  | C  | F  | A  | A  | N  | A  | SSN   | W  | DKR   | S  | A  | Y  | A  | T  | I  | T  | H   | Y   | G   | L   | A   | L   | A   | L   | K   | P   | K   | E   |
| HuN-YY-A  | Q                | P  | W  | C  | F  | A  | V  | N  | A  | SNN   | W  | DKK   | D  | V  | Y  | A  | T  | I  | T  | Y   | Y   | G   | L   | T   | F   | A   | L   | K   | P   | K   | G   |
| HeB-XT-A  | Q                | P  | W  | Y  | F  | A  | A  | N  | A  | SNN   | W  | GTR   | S  | V  | Y  | A  | T  | I  | T  | Y   | F   | K   | L   | A   | L   | A   | L   | K   | P   | R   | G   |
| HuN-CS-A  | Q                | L  | W  | C  | F  | V  | A  | N  | A  | MSN   | W  | DRH   | S  | A  | Y  | A  | T  | L  | T  | Y   | Y   | G   | F   | A   | L   | A   | L   | K   | P   | K   | E   |
| HuN-ZZ-A  | Q                | L  | W  | C  | F  | V  | A  | N  | A  | MSN   | W  | NKN   | S  | V  | Y  | A  | T  | I  | T  | Y   | C   | R   | F   | A   | L   | A   | L   | K   | P   | K   | E   |
| HuN-YY-B  | Q                | P  | W  | C  | F  | V  | A  | N  | A  | MSN   | W  | NKN   | S  | V  | Y  | A  | T  | I  | T  | Y   | Y   | R   | F   | A   | L   | A   | L   | K   | P   | K   | E   |
| HuN-CS-B  | Q                | L  | W  | C  | F  | V  | A  | N  | A  | MSN   | W  | NKN   | S  | V  | Y  | A  | T  | I  | T  | Y   | Y   | R   | F   | A   | L   | A   | L   | K   | P   | K   | E   |
| HuN-ML-A1 | Q                | L  | W  | C  | F  | V  | A  | N  | A  | MSN   | W  | NKN   | S  | V  | Y  | A  | T  | I  | T  | Y   | Y   | R   | F   | A   | L   | A   | L   | K   | P   | R   | E   |
| HuN-LD-B  | Q                | P  | W  | C  | F  | V  | A  | N  | A  | MSN   | W  | NKK   | D  | V  | Y  | A  | T  | A  | I  | Y   | C   | N   | L   | V   | L   | A   | L   | K   | S   | K   | G   |
| HuN-XT-A  | Q                | P  | W  | C  | F  | V  | A  | N  | A  | MSN   | W  | NKK   | D  | V  | Y  | A  | T  | A  | I  | Y   | C   | N   | L   | V   | L   | A   | L   | K   | S   | K   | G   |
| HuN-XT-B  | Q                | L  | W  | C  | F  | V  | A  | N  | A  | MSN   | W  | NSR   | D  | V  | Y  | A  | T  | A  | T  | Y   | F   | N   | L   | V   | L   | A   | L   | K   | S   | K   | G   |
| HeB-XT-B  | Q                | P  | W  | Y  | L  | A  | A  | T  | A  | SND   | W  | SEK   | S  | V  | Y  | A  | M  | V  | T  | Y   | N   | M   | L   | A   | L   | A   | V   | K   | P   | R   | G   |
| HeB-HD-A  | Q                | P  | W  | Y  | L  | A  | A  | T  | V  | SND   | W  | SEK   | S  | V  | Y  | A  | M  | V  | T  | Y   | N   | M   | L   | A   | L   | A   | V   | K   | P   | R   | G   |

|           |   |   |   |   |   |   |   |   |   |     |   |     |   |   |   |   |   |   |   |   |   |   |   |   |   |   |   |   |   |   |   |
|-----------|---|---|---|---|---|---|---|---|---|-----|---|-----|---|---|---|---|---|---|---|---|---|---|---|---|---|---|---|---|---|---|---|
| HeB-TS-A  | Q | P | W | Y | L | A | A | T | V | SND | W | SEK | S | V | Y | A | M | V | T | Y | N | M | L | A | L | A | V | K | P | R | G |
| HeB-ZJK-A | Q | P | W | Y | L | A | A | T | A | SND | W | SEK | S | V | Y | A | M | V | T | Y | N | M | L | A | L | A | V | K | P | R | G |
| HeB-BD-A  | Q | P | W | Y | L | A | A | T | A | SND | W | SEK | S | V | N | P | M | V | T | Y | N | M | L | A | L | A | V | K | P | R | G |
| HeB-SJZ-C | Q | P | W | Y | L | A | A | T | A | SND | R | SEK | S | V | Y | A | M | V | T | Y | N | M | L | A | L | A | V | K | P | R | G |
| HeB-SJZ-A | Q | P | W | Y | L | A | A | N | A | SND | G | SEK | S | V | Y | A | M | V | T | H | Y | K | L | A | L | A | V | K | P | R | G |
| HeB-XT-C  | Q | P | W | Y | L | A | A | N | A | SND | W | SEK | S | V | Y | A | M | V | T | Y | Y | K | L | A | L | A | V | - | P | R | G |
| HeB-QHD-B | P | P | L | C | F | T | A | N | A | SNS | W | GKH | S | V | Y | A | T | I | T | Y | R | E | L | A | L | V | L | - | P | K | G |
| HeB-QHD-A | P | P | L | C | F | T | A | N | A | SNS | W | GKH | S | V | Y | A | T | I | T | Y | R | E | L | A | L | V | L | K | P | K | G |
| HeB-SJZ-B | P | P | L | C | F | T | A | N | A | SNS | W | GKH | S | V | Y | A | T | I | T | Y | R | E | L | A | L | V | L | K | P | K | G |

**Supplemental Table S3.** Comparison of GP5 amino acid sequences of sublineage 8.7 PRRSV strains identified in the present study.

| Strains   | Amino acid sites |    |    |    |    |    |    |     |     |     |     |     |     |
|-----------|------------------|----|----|----|----|----|----|-----|-----|-----|-----|-----|-----|
|           | 10               | 15 | 23 | 35 | 58 | 59 | 69 | 104 | 151 | 164 | 191 | 196 | 200 |
| JXA1      | C                | L  | F  | N  | Q  | K  | I  | G   | R   | G   | R   | L   | L   |
| HuN-LD-A  | C                | L  | F  | N  | Q  | K  | I  | G   | R   | G   | R   | L   | L   |
| HuN-YY-C  | C                | L  | F  | N  | Q  | K  | L  | G   | R   | R   | R   | L   | L   |
| HuN-SY-B  | C                | P  | F  | N  | Q  | K  | I  | G   | R   | R   | R   | L   | L   |
| HuN-ML-A2 | C                | L  | F  | S  | Q  | K  | I  | G   | R   | R   | R   | L   | L   |
| HuN-ZZ-B  | C                | L  | C  | S  | R  | N  | L  | G   | R   | R   | K   | L   | L   |
| HeB-HD-B  | C                | L  | S  | N  | Q  | K  | I  | G   | K   | G   | R   | R   | L   |
| HuN-ZJJ-A | C                | L  | S  | N  | Q  | K  | I  | G   | K   | G   | R   | R   | L   |
| HeB-CD-B  | C                | L  | S  | N  | Q  | Q  | I  | G   | K   | G   | R   | R   | P   |
| HeB-QHD-C | C                | L  | S  | N  | Q  | K  | I  | A   | K   | G   | R   | R   | P   |
| HuN-ZJJ-B | C                | L  | S  | N  | Q  | R  | I  | G   | K   | G   | R   | R   | L   |
| HeB-SJZ-D | F                | P  | F  | N  | Q  | K  | I  | G   | R   | R   | R   | L   | P   |
| HeB-TS-B  | F                | P  | F  | N  | Q  | K  | I  | W   | R   | R   | R   | L   | P   |
